# Supplementary material for: Efficient Delivery of Antimicrobial Peptides in an Innovative, Slow-Release Pharmacological Formulation
Source: MDPI journal article supplement (doi:10.3390/pharmaceutics15112632), 2023-11-16
Supplement: s1 [file s1]

Article

# Efficient Delivery of Antimicrobial Peptides in an Innovative, Slow-Release Pharmacological Formulation

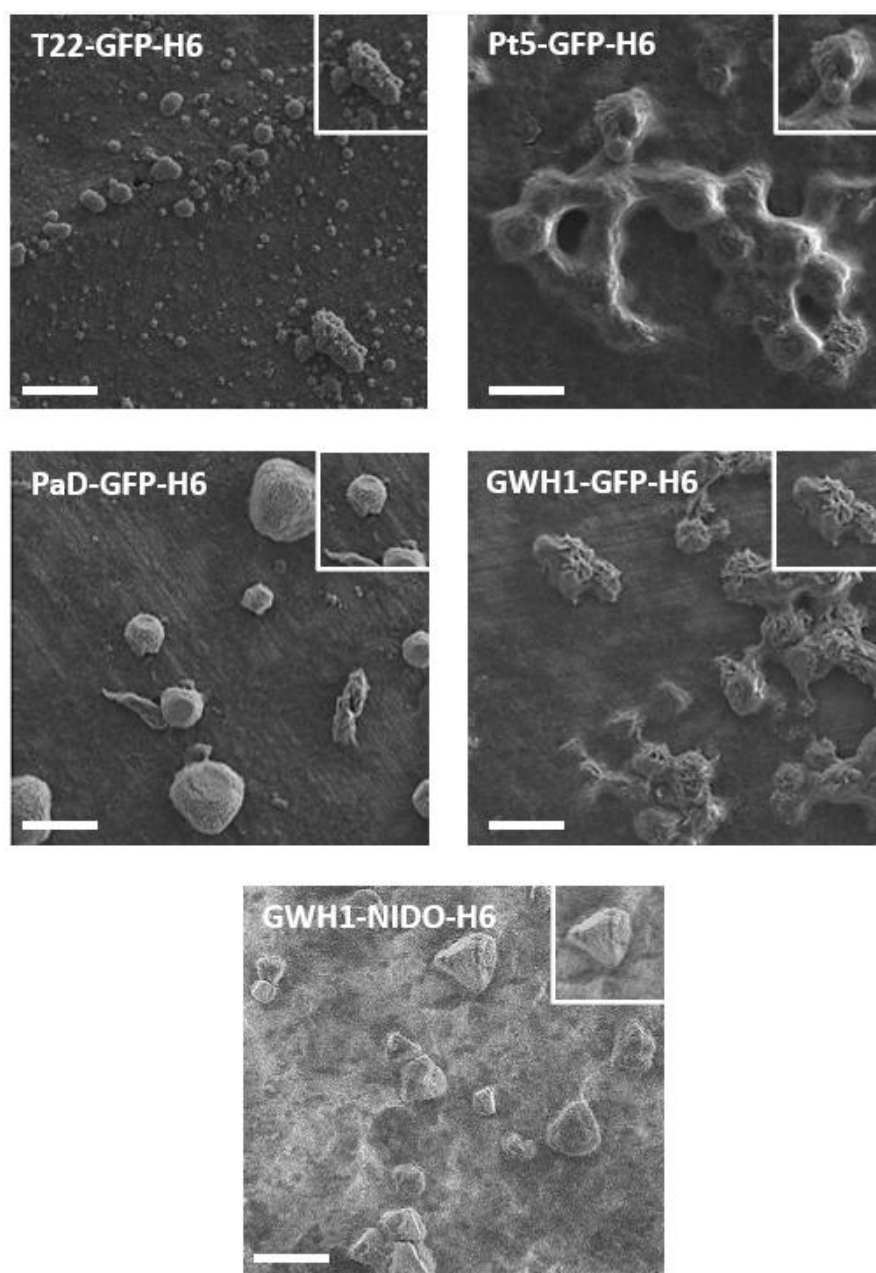

**Supplementary Figure S1.** Ultrastructural morphology of AMP-based secretory granules. White bars refer to 2  $\mu\text{m}$ .
